# Supplementary material for: Profiling Wildlife Crimes Prosecuted Federally by the United States
Source: Frontiers journal article supplement (doi:10.3389/fcosc.2021.811516), 2022-02-21
Supplement: Table_2.DOCX [file Table_2.DOCX]

# Supplementary Table 2

**Supplementary Table 2.** Complete list of species involved in federally prosecuted wildlife crime cases 2014-2018 with associated counts of involvement

| *Species names have been taken directly from federal indictment and sentencing case files. No major edits have been made to condense species (unless obvious duplicates of both common and scientific names) in order to keep records accurate and intact.* | | |
| --- | --- | --- |
| **Common Name** | **BOLD names are from case records,** non-bolded are researched assumptions | **Count** |
| Bald eagle | ***Haliaeetus leucocephalus*** | 17 |
| American eel | ***Anguilla rostrata*** | 14 |
| Black rhinoceros | ***Diceros bicornis*** | 8 |
| Rhinoceros |  | 8 |
| Golden eagle | ***Aquila chrysaetos*** | 7 |
| Red-tailed hawk | ***Buteo jamaicensis*** | 7 |
| African elephant | ***Loxodonta africana*** | 6 |
| Asian elephant | ***Elephas maximus*** | 6 |
| Atlantic striped bass | ***Morone saxatilis*** | 6 |
| Blue grosbeak | ***Guiraca cycaerulea / Passerina caerulea*** | 6 |
| Indigo buntings | ***Passerina cyanea*** | 6 |
| Migratory bird |  | 6 |
| White-tailed deer | *Odocoileus virginianus* | 6 |
| Eastern box turtle | ***Terrapene carolina carolina*** | 5 |
| Elephant |  | 5 |
| North American wood turtle | ***Glyptemys insculpta*** | 4 |
| Painted bunting | ***Passerina ciris*** | 4 |
| Scup | *Stenotomus chrysops* | 4 |
| Yellow-faced grassquit | ***Tiaris olivaceus*** | 4 |
| Black bear | ***Ursus americanus*** | 3 |
| Cooper's hawk | ***Accipiter cooperii*** | 3 |
| Deer |  | 3 |
| Sharp-shinned hawk | ***Accipiter striatus*** | 3 |
| Alligator snapping turtle | ***Macrochelys temminckii*** | 2 |
| Asian arowana fish | ***Scleropages formosus*** | 2 |
| Bear |  | 2 |
| Black sea bass | *Centropristis striata* | 2 |
| Bluefish | *Pomatomus saltatrix* | 2 |
| Bonnethead shark | ***Sphyrna tiburo*** | 2 |
| California mountain kingsnake | ***Lampropeltis zonata*** | 2 |
| Canada goose | *Branta canadensis* | 2 |
| Chinese hwamei | ***Garrulax canorus*** | 2 |
| Coastal plain milk snake | ***Lampropeltis triangulum temporalis*** | 2 |
| Corn snake | ***Elaphe guttata guttata*** | 2 |
| Diamondback terrapin | ***Malaclemys terrapin*** | 2 |
| Florida box turtle | *Terrapene carolina bauri* | 2 |
| Florida spiny lobster | ***Panulirus argus*** | 2 |
| Gadwall | *Mareca strepera* | 2 |
| Ginseng | *Panax ginseng* | 2 |
| Great horned owl | ***Bubo virginianus*** | 2 |
| Hake | *Merluccius* | 2 |
| Hawk |  | 2 |
| Leopard | ***Panthera pardus*** | 2 |
| Live rock | ***Ricordea florida*** | 2 |
| Macaque | *Macaca* | 2 |
| Mallard duck | ***Anas platyrhynchos*** | 2 |
| Migratory game bird |  | 2 |
| Northern cardinal | ***Cardinalis cardinalis*** | 2 |
| Northern pine snake | ***Pituophis melanoleucus melanoleucus*** | 2 |
| Outer banks kingsnake | ***Lampropeltis getula sticticeps*** | 2 |
| Pacific walrus | ***Odobenus rosmarus*** | 2 |
| Pintail | ***Anas acuta*** | 2 |
| Rose-breasted grosbeak | ***Pheucticus ludovicianus*** | 2 |
| Rough-legged hawk | ***Buteo lagopus*** | 2 |
| Sea turtle |  | 2 |
| Snow Geese | *Anser caerulescens* | 2 |
| Squid |  | 2 |
| Summer flounder | *Paralichthys dentatus* | 2 |
| Swedish goshawk | *Accipiter gentilis* | 2 |
| Tiger | ***Panthera tigris*** | 2 |
| Totoaba | ***Totoaba macdonaldi*** | 2 |
| Whooping crane | ***Grus americana*** | 2 |
| Wood duck | ***Aix sponsa*** | 2 |
| African lion | ***Panthera leo*** | 1 |
| African spurred tortoise | ***Geochelone sulcata*** | 1 |
| Albino red-eared slider | *Trachemys scripta elegans* | 1 |
| Allen's hummingbird | ***Selasphorus sasin*** | 1 |
| Atlantic blue crab | ***Callinectes sapidus*** | 1 |
| Atlantic salmon | *Salmo salar* | 1 |
| Babirusa | *Babyrousa babyrussa* | 1 |
| Bali Mynas Asian songbird | ***Leucopsar rothschildi*** | 1 |
| Ball python | ***Python regius*** | 1 |
| Barn owl | ***Tyto alba*** | 1 |
| Beale's eyed turtle | *Sacalia bealei* | 1 |
| Bengal tiger | ***Panthera tigris tigris*** | 1 |
| Black duck |  | 1 |
| Black pond spotted turtle | *Geoclemys hamiltonii* | 1 |
| Black-breasted leaf turtle | *Geoemyda spengleri* | 1 |
| Black-chinned hummingbird | ***Ardhilochus alexandri*** | 1 |
| Black-crowned night heron | ***Nycticorax nycticorax*** | 1 |
| Blanding's turtle | *Emys blandingii or Emydoidea blandingii* | 1 |
| Blonde grizzly bear | *Ursus arctos horribilis* | 1 |
| Blue and gold macaw | ***Ara ararauna*** | 1 |
| Blue-spotted salamander | *Ambystoma laterale* | 1 |
| Bobolink | ***Dolichonyx oryqivorus*** | 1 |
| Bottlenose dolphin | *Tursiops truncatus* | 1 |
| Box turtle | ***Terrapene*** | 1 |
| Bufflehead | *Bucephala albeola* | 1 |
| California sea cucumber | *Apostichopus californicus* | 1 |
| California tiger salamander | ***Ambystoma californiense*** | 1 |
| Canvasback | *Aythya valisineria* | 1 |
| Chinese big headed turtle | *Platysternon megacephalum* | 1 |
| Chinese red swimming crab | ***Portunus haanii*** | 1 |
| Clam | ***Tridacna sp.*** | 1 |
| Clay-colored sparrow | ***Spizella palida*** | 1 |
| Coho salmon | *Oncorhynchus kisutch* | 1 |
| Crane | ***Gruidae*** | 1 |
| Cuban bullfinch | ***Melopyrrha nigra*** | 1 |
| Cynomologus monkey | *Macaca fascicularis* | 1 |
| Dall sheep | *Ovis dalli* | 1 |
| Dark-morph hawk | ***Buteo*** | 1 |
| Desert Tortoise | *Gopherus agassizii* | 1 |
| Devils hole pupfish | ***Cyprinodon diabolis*** | 1 |
| Doves, pigeons | ***Columbidae*** | 1 |
| Duck | *Anatidae* | 1 |
| Ducks | ***Anatidae*** | 1 |
| Dugong | *Dugong dugon* | 1 |
| Eastern kingsnake | ***Lampropeltis getula getula*** | 1 |
| Eastern tiger salamander | *Ambystoma tigrinum tigrinum* | 1 |
| Fish |  | 1 |
| Flattened musk turtle | *Sternotherus depressus* | 1 |
| Fluke |  | 1 |
| Four-eyed turtle | *Sacalia quadriocellata* | 1 |
| Goldeneye | *Bucephala clangula* | 1 |
| Goose |  | 1 |
| Grasshopper sparrow | ***Ammodramus savannarum*** | 1 |
| Gray Catbird | ***Dumetella carolinensis*** | 1 |
| Great blue heron | ***Andea herodias*** | 1 |
| Great green macaw | ***Ara ambiguus*** | 1 |
| Gulf coast box turtle | *Terrapene carolina major* | 1 |
| Halibut | *Hippoglossus* | 1 |
| Harlequin macaw | ***Ara chloropterus x Ara ararauna*** | 1 |
| Helmeted hornbill | *Rhinoplax vigil* | 1 |
| Hog |  | 1 |
| Hummingbird | ***Archilochus*** | 1 |
| Indian flapshell turtle | *Lissemys punctata* | 1 |
| Indian roofed turtle | *Pangshura tecta* | 1 |
| Indian star tortoise | *Geochelone elegans* | 1 |
| Indo-West Pacific crab | ***Portunus selagicus*** | 1 |
| Kemp's ridley sea turtle | ***Lepidochelys kempii*** | 1 |
| Key deer | ***Odocoileus virginianus clavium*** | 1 |
| King cobra | ***Ophiophagus hannah*** | 1 |
| Langur |  | 1 |
| Laughing gulls | ***Leucophaeus atricilla*** | 1 |
| Lazuli bunting | ***Passerina amoena*** | 1 |
| Leopard cat | ***Prionailurus bengalensis*** | 1 |
| Live rock | ***Scleractinia sp.*** | 1 |
| Live rock |  | 1 |
| Lobster |  | 1 |
| Loggerhead shrike | ***Lanius ludovicianus*** | 1 |
| Mahogany | ***Swietenia macrophylla*** | 1 |
| Mexican shrimp |  | 1 |
| Military macaw | ***Ara militaris*** | 1 |
| Mongolian oak | ***Quercus monglica*** | 1 |
| Moose |  | 1 |
| Olive ridley sea turtle | ***Lepidochelys olivacea*** | 1 |
| Orangutan | *Pongo* | 1 |
| Owl |  | 1 |
| Philippine serpent eagle | *Spilornis holospilus* | 1 |
| Puerto Rican bullfinch | ***Loxigiilla portoricensis*** | 1 |
| Puerto Rican spindalises | ***Spindalis portoricensis*** | 1 |
| Rails, coots, gallinules | ***Rallidae*** | 1 |
| Red drum | ***Sciaenops ocellatus*** | 1 |
| Red snapper | *Lutjanus campechanus* | 1 |
| Red-billed leiothrix Asain songbird | ***Leiothrix lutea*** | 1 |
| Red-shouldered Hawk | ***Buteo lineatus*** | 1 |
| Redhead |  | 1 |
| Reeves' Turtle | *Mauremys reevesii* | 1 |
| Ring-necked duck | *Aythya collaris* | 1 |
| Rosy-faced lovebird | ***Agapornis roseicollis*** | 1 |
| Ruby-throated hummingbird | ***Archilochus colubris*** | 1 |
| San Bernardino mountain kingsnake | ***Lampropeltis zonata parvirubra*** | 1 |
| San Diego mountain kingsnake | ***Lampropeltis zonata pulchra*** | 1 |
| Sand crab | ***Ovalipes punctatus*** | 1 |
| Scarlet macaw | ***Ara macao*** | 1 |
| Screech-owl | ***Megascops*** | 1 |
| Sea bass |  | 1 |
| Sea urchin | *Echinoidea* | 1 |
| Seatrout | *Salmo trutta* | 1 |
| Shellfish |  | 1 |
| Shrimp |  | 1 |
| Siberian tiger | ***Panthera tigris altaica*** | 1 |
| Silver-eared Mesia Asian songbird | ***Leiothrix argentauris*** | 1 |
| Snowy owl | ***Bubo scandiacus*** | 1 |
| Soft coral | ***Zoanthus pulchellus*** | 1 |
| South American river turtle | *Podocnemis expansa* | 1 |
| Sperm whale | *Physeter macrocephalus* | 1 |
| Spikenard | ***Spikenard Nardostachys grandiflora / jatamansi*** | 1 |
| Spiny lobster | *Palinuridae* | 1 |
| Spotted turtle | ***Clemmys guttata*** | 1 |
| Steller sea lion | *Eumetopias jubatus* | 1 |
| Summer tanager | ***Piranga rubra*** | 1 |
| Swan |  | 1 |
| Swedish goshawk | ***Agapornis fischeri*** | 1 |
| Swimming crab | *Callinectes arcuatus* | 1 |
| Three-toed box turtle | *Terrapene carolina triunguis* | 1 |
| Tree | ***Swintonia floribunda*** | 1 |
| Tropical eastern Pacific crab | ***Callinectes bellicosis*** | 1 |
| Tropical western Pacific crab | ***Callinectes bocourti*** | 1 |
| Turkey vulture | ***Cathartes aura*** | 1 |
| Turtle |  | 1 |
| Violet-crowned hummingbird | ***Amazilia violiceps*** | 1 |
| Welsh oak | ***Quercus petraea*** | 1 |
| Western diamondback rattlesnake | ***Crotalus atrox*** | 1 |
| White ibis | ***Eudocimus albus*** | 1 |
| White leucistic boa |  | 1 |
| White-crowned sparrow | ***Zonotrichia leucophrys*** | 1 |
| White-fronted goose | *Anser albifrons* | 1 |
| Woodcock snipe | ***Scolopacidae*** | 1 |
| Yellow blotch map turtle | *Graptemys flavimaculata* | 1 |
| Yellow-crowned night heron | ***Nyctanssa violacea*** | 1 |
| Yellow-margined Chinese box turtle | *Cuora flavomarginata* | 1 |
